# Supplementary material for: Propagative α-synuclein seeds as serum biomarkers for synucleinopathies
Source: Springer Nature journal article supplement (doi:10.1038/s41591-023-02358-9), 2023-05-29
Supplement: MOESM1 [file 41591_2023_2358_MOESM1_ESM.pdf]

# Propagative $\alpha$ -synuclein seeds as serum biomarkers for synucleinopathies

---

In the format provided by the  
authors and unedited

1    **Supplementary Figures and Tables**

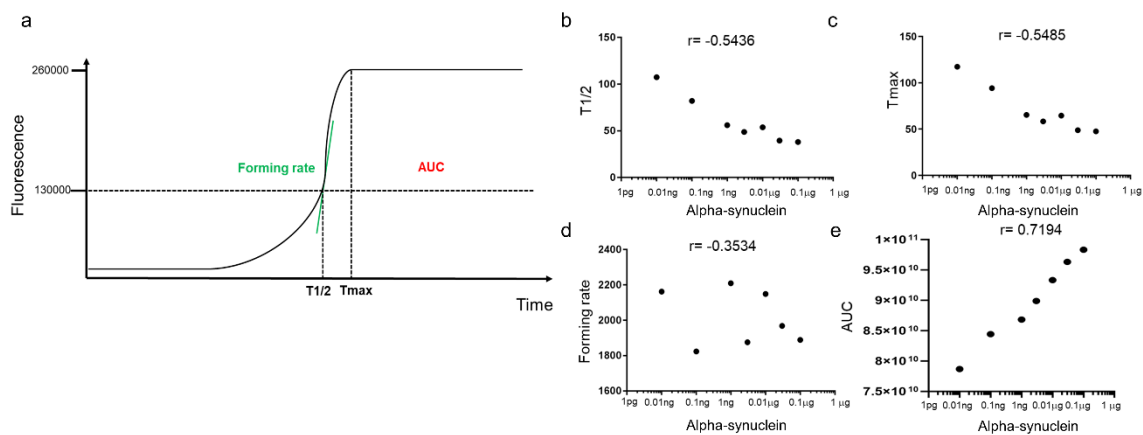

2

3    **Supplementary Fig. 1. Parameters of  $\alpha$ -synuclein amyloid formation with IP/RT-**  
4    **QuIC.**

5    We analyzed 100  $\mu$ l of eight different concentrations of the recombinant  $\alpha$ -synuclein  
6    fibril: 10 ng/ $\mu$ L, 1 ng/ $\mu$ L, 0.1 ng/ $\mu$ L, 0.01 ng/ $\mu$ L, 0.001 ng/ $\mu$ L, and 0 ng/ $\mu$ L. We used 10  
7    ng/ $\mu$ L to 0.01 ng/ $\mu$ L of recombinant  $\alpha$ -synuclein fibrils as positive controls because these  
8    concentrations ensure that the relative fluorescence unit value reaches 260,000. We used  
9    0 ng/ $\mu$ l as the negative control because the relative fluorescence unit value is less than  
10    260,000. A concentration of 0.001 ng/ $\mu$ l (1000 pg/ml) may or may not reach 260,000.

11    (a) Schematic view of the parameters of serum  $\alpha$ -synuclein-IP/RT-QuIC. (b) The time to  
12    reach 130k fluorescence ( $T_{1/2}$ ) and (c) the time to reach maximum (260k) fluorescence

13 ( $T_{\max}$ ) are shortened in a dose-dependent manner. (d) The amyloid formation rate is not  
14 dependent on  $\alpha$ -synuclein fibrils. The forming rate is represented by the slope of the  
15 tangent line at the inflection point in the sigmoid curve of IP/RT-QuIC and indicates the  
16 rate of aggregate formation. (e) The area under the curve (AUC) is increased in a dose-  
17 dependent manner in  $\alpha$ -synuclein fibrils.

18 IP/RT-QuIC, immunoprecipitation/real-time quaking-induced conversion

19

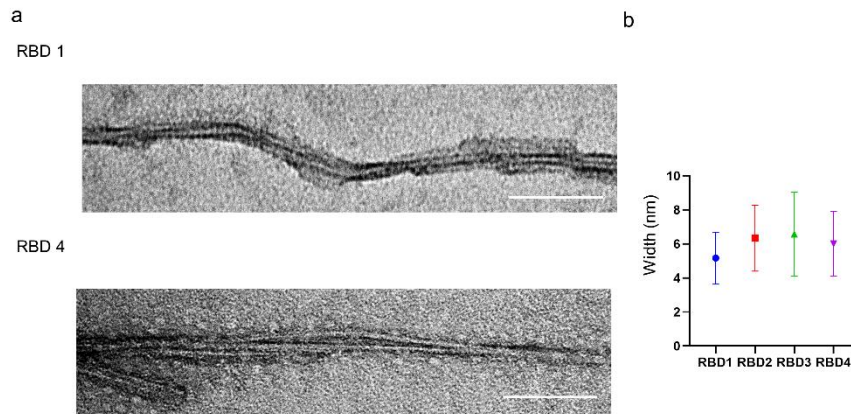

**Supplementary Fig. 2. Morphological analysis of amplified products derived from RBD cases with positive IP/RT-QuIC results.**

(a) Negative-stained transmission electron microscopy images of  $\alpha$ -synuclein fibrils derived from RBD cases. (b) The widths of products derived from RBD cases with positive IP/RT-QuIC results are shown. The data represent mean  $\pm$  standard error of the mean. We measured the width at two sites per fibril (n=3). Scale bars are 100 nm. RBD, rapid eye movement sleep behavior disorder.

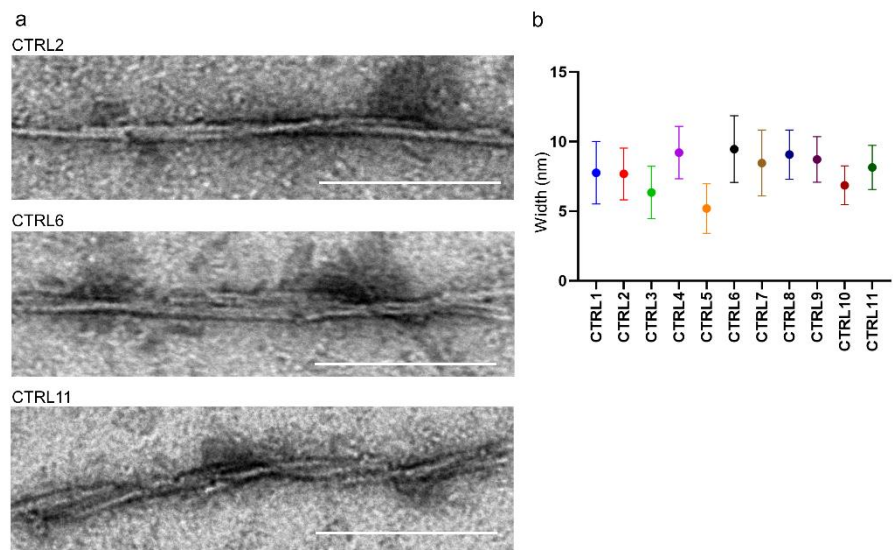

**Supplementary Fig. 3. Morphological analysis of amplified products derived from control cases with positive IP/RT-QuIC results.**

(a) Negative-stained transmission electron microscopy images of  $\alpha$ -synuclein fibrils derived from controls. (b) The widths of products derived from controls with positive IP/RT-QuIC results are shown. The data represent mean  $\pm$  standard error of the mean. We measured the width at two sites per fibril (n=3). Scale bars are 100 nm.

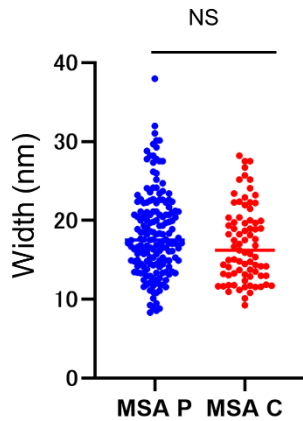

**Supplementary Fig. 4. The widths of  $\alpha$ -synuclein fibrils derived from MSA-P and MSA-C.**

Each dot corresponds to a different fibril. Data are expressed as mean  $\pm$  standard error of the mean. Statistical analysis was conducted using a two-tailed t-test ( $p=0.7089$ ).

MSA-P,  $n=26$ ; MSA-C,  $n=13$ . We measured the width of 10 fibrils at two sites for each fibril.

MSA, multiple system atrophy; MSA-C, MSA cerebellar variant; MSA-P, MSA Parkinsonian variant; NS, not significant

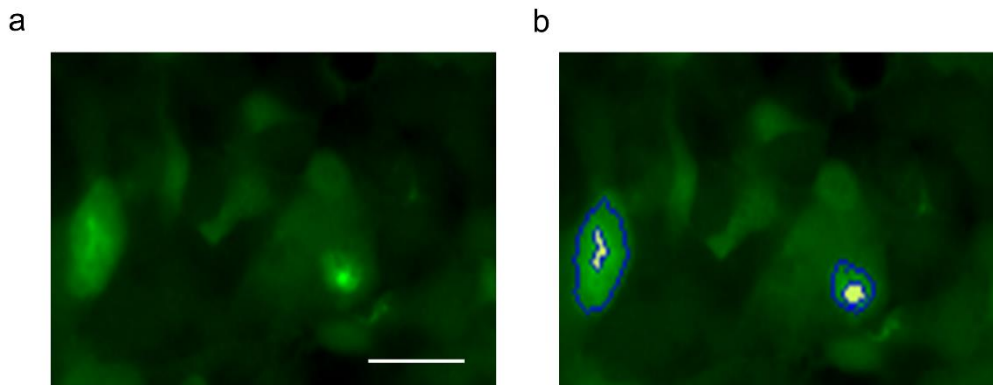

**Supplementary Fig. 5. Fluorescence density measurement method**

(a) Original image. We confirmed 100 cells per case using the Hybrid Cell Count software.

(b) The fluorescence density of intracellular  $\alpha$ -synuclein inclusions generated by seeds derived from patients with Lewy body diseases and MSA was calculated as the fluorescent intensity of inclusion bodies (yellow) divided by the area of inclusions (blue).

Hybrid Cell Count software was used to measure the fluorescence intensity. Scale bar: 50  $\mu$ m.

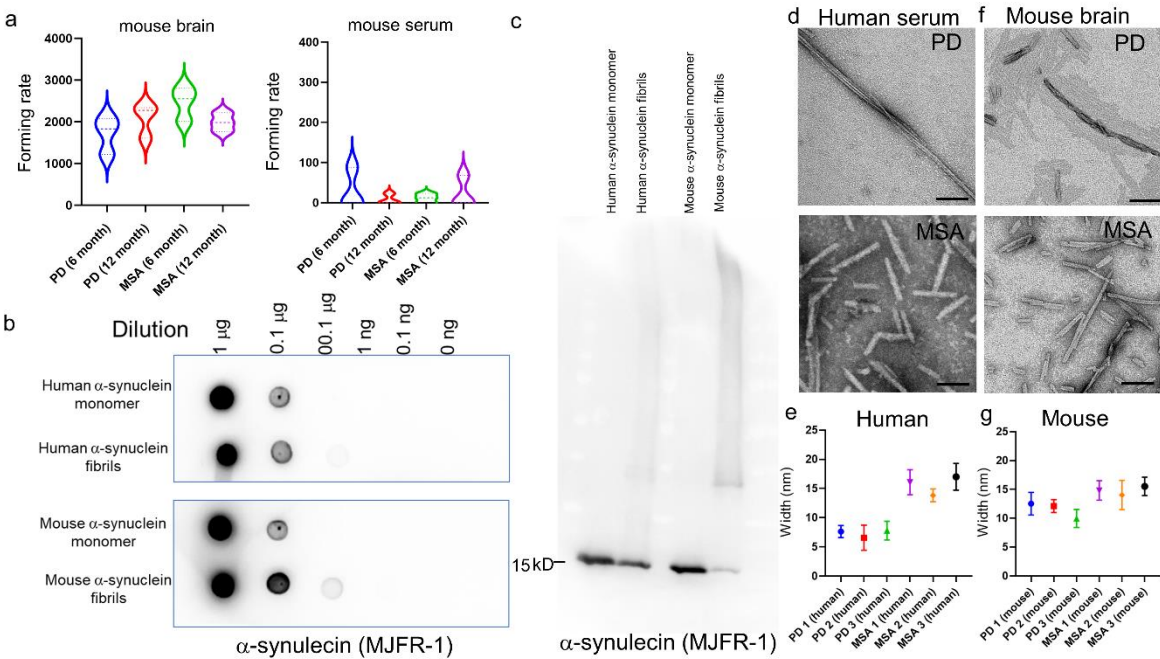

**Supplementary Fig. 6.  $\alpha$ -synuclein seed properties in the mouse model**

(a) Comparison of the forming rates of each group. The violin plots matched those represented in the kinetic curves. Violin plots show the range and average distribution.

Dot blot (b) and western blot (repeated two times) (c) confirmed that MJFR-1, an anti- $\alpha$ -synuclein antibody, detected the mouse and human  $\alpha$ -synuclein monomer and fibril.

Negative-stained transmission electron microscopy images of the original product amplified by human serum IP/RT-QuIC from PD or MSA patients (d, e) and mouse brain RT-QuIC-derived  $\alpha$ -synuclein fibrils (f, g) obtained from PD- or MSA-seed injected mouse brain. The widths of  $\alpha$ -synuclein fibrils derived from human serum (e) or mouse brain (g) are shown. We measured the width at two sites per fibril (n=3). The data represent mean  $\pm$  standard error of the mean. Scale bars are 100 nm. MSA, multiple



70 system atrophy; NS, not significant; PD, Parkinson's disease.

71

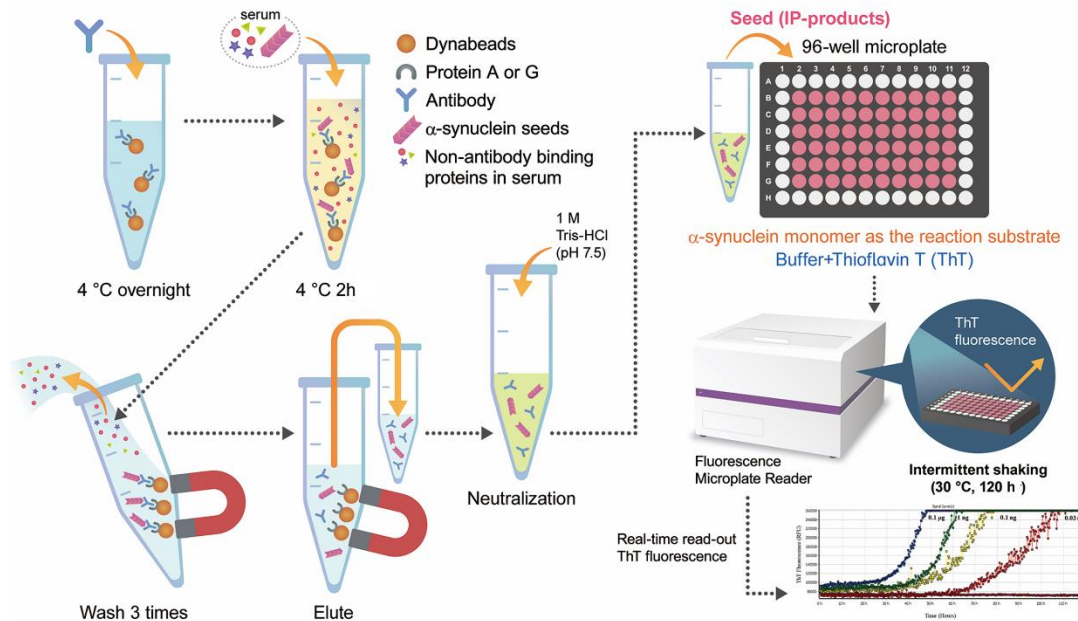

### Supplementary Fig. 7. Protocol steps of the IP/RT-QuIC

First, 100  $\mu$ L of IP lysis buffer (1% BSA, 150 mM NaCl, 1% Triton X, 50 mM Tris HCl, pH 7) containing 1.7  $\mu$ g MJFR-1 (anti- $\alpha$ -synuclein antibody: Abcam, UK) and 30  $\mu$ L of protein A/G magnetic beads (Thermo Fisher Scientific, USA) were incubated overnight at 4 °C. Then, 100  $\mu$ L of serum (1 mg protein/mL) was added to the buffer and rotated at 4 °C for 2 h. The proteins were eluted using 20  $\mu$ L of 50 mM glycine, and the samples were adjusted to pH 7.5. The reaction buffer (RB) contained 100 mM phosphate buffer (pH 7.5-8.0), 10  $\mu$ M thioflavin T (ThT), 0-170 mM NaCl, and 0.1 mg/mL recombinant  $\alpha$ -synuclein. Each well of a black 96-well plate with a clear bottom (Thermo Fisher Scientific, USA) contained 95  $\mu$ L of RB and  $37 \pm 3$  mg of 0.5-mm zirconium/silica beads (Thermo Fisher Scientific, USA). Reactions were seeded with 5  $\mu$ L of IP product solution

84 from the serum to a final reaction volume of 100  $\mu$ L. The plates were incubated in a  
85 FLUOstar OPTIMA microplate reader (BMG Labtech, Germany) at 30 °C for 120 h with  
86 intermittent shaking cycles: double-orbital with 1 min of shaking at 200 rpm followed by  
87 14 min of rest. ThT fluorescence measurements (450 nm excitation and 480 nm emission)  
88 were taken every 15 min.  
89

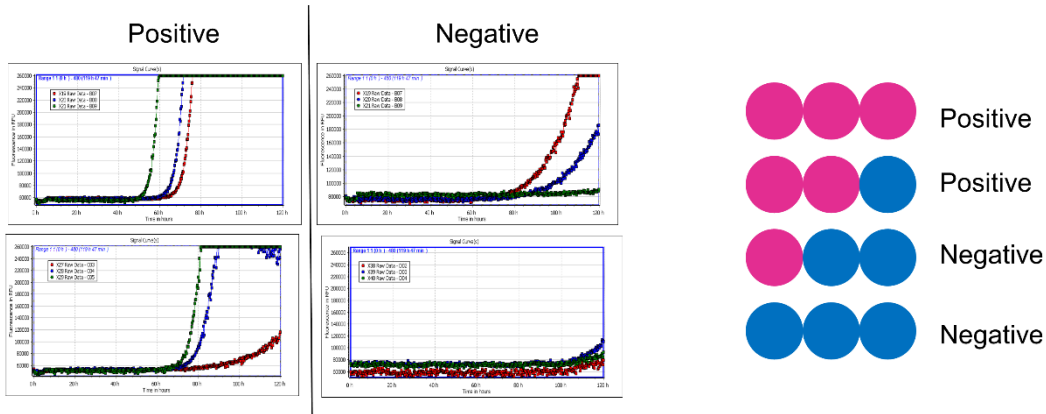

**Supplementary Fig. 8. Definition of a positive and negative response in IP/RT-QuIC**

A positive response was defined as a relative fluorescence unit value of >260,000 at 120 h. Positive signals in two or more of the triplicate wells were considered positive. It was considered negative if the relative fluorescence unit value did not reach 260,000 within 120 h.

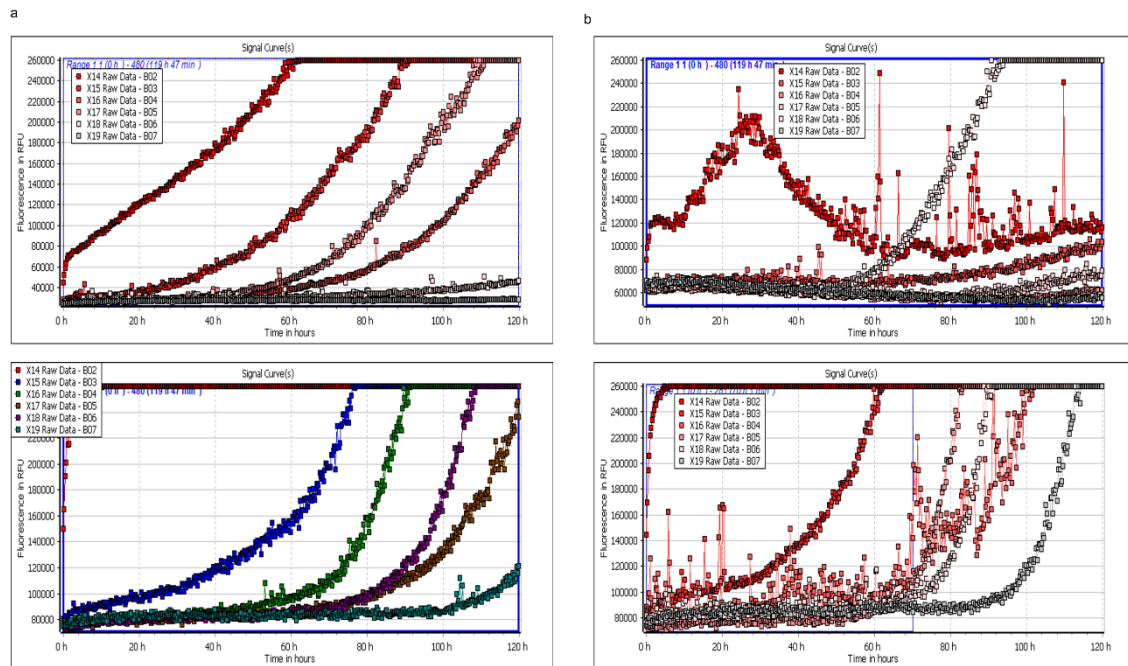

**Supplementary Fig. 9. Standard curves of IP/RT-QuIC**

We use six different concentrations as standards: 10 ng/ $\mu$ l (B02), 1 ng/ $\mu$ l (B03), 0.1 ng/ $\mu$ l (B04), 0.01 ng/ $\mu$ l (B05), 0.001 ng/ $\mu$ l (B06), and 0 ng/ $\mu$ l (B07). An increase in the fluorescence intensity in the concentration dependence from 10 ng/ $\mu$ l to 0.01 ng/ $\mu$ l ensures that the relative fluorescence unit value reaches 260,000, 0 ng/ $\mu$ l relative fluorescence unit value is less than 260,000, and 0.001 ng/ $\mu$ l may or may not reach 260,000. An increase in the fluorescence intensity indicates that (a) the result of IP/RT-QuIC is reliable. On the contrary, if no increase in the fluorescence intensity of the concentration dependence is observed, (b) the reliability of the results of IP/RT-QuIC at that time is considered low, and all IP/RT-QuIC at that time are re-performed from scratch.

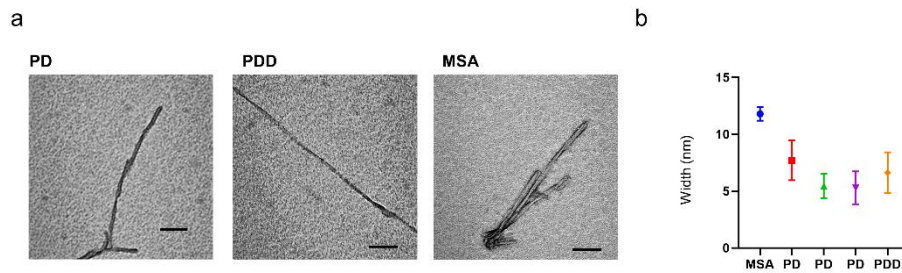

**Supplementary Fig. 10. Morphological analysis of amplified products derived from pathologically confirmed synucleinopathies cases with positive IP/RT-QuIC results**

(a) Negative-stained transmission electron microscopy images of  $\alpha$ -synuclein fibrils derived from pathologically confirmed synucleinopathies. (b) The widths of products derived from PD, PDD, and MSA with positive IP/RT-QuIC results are shown. The data represent mean  $\pm$  standard error of the mean. We measured the width at two sites per fibril (n=3). Scale bars are 100 nm. MSA, Multiple system atrophy; PD, Parkinson's disease; PDD, PD with dementia

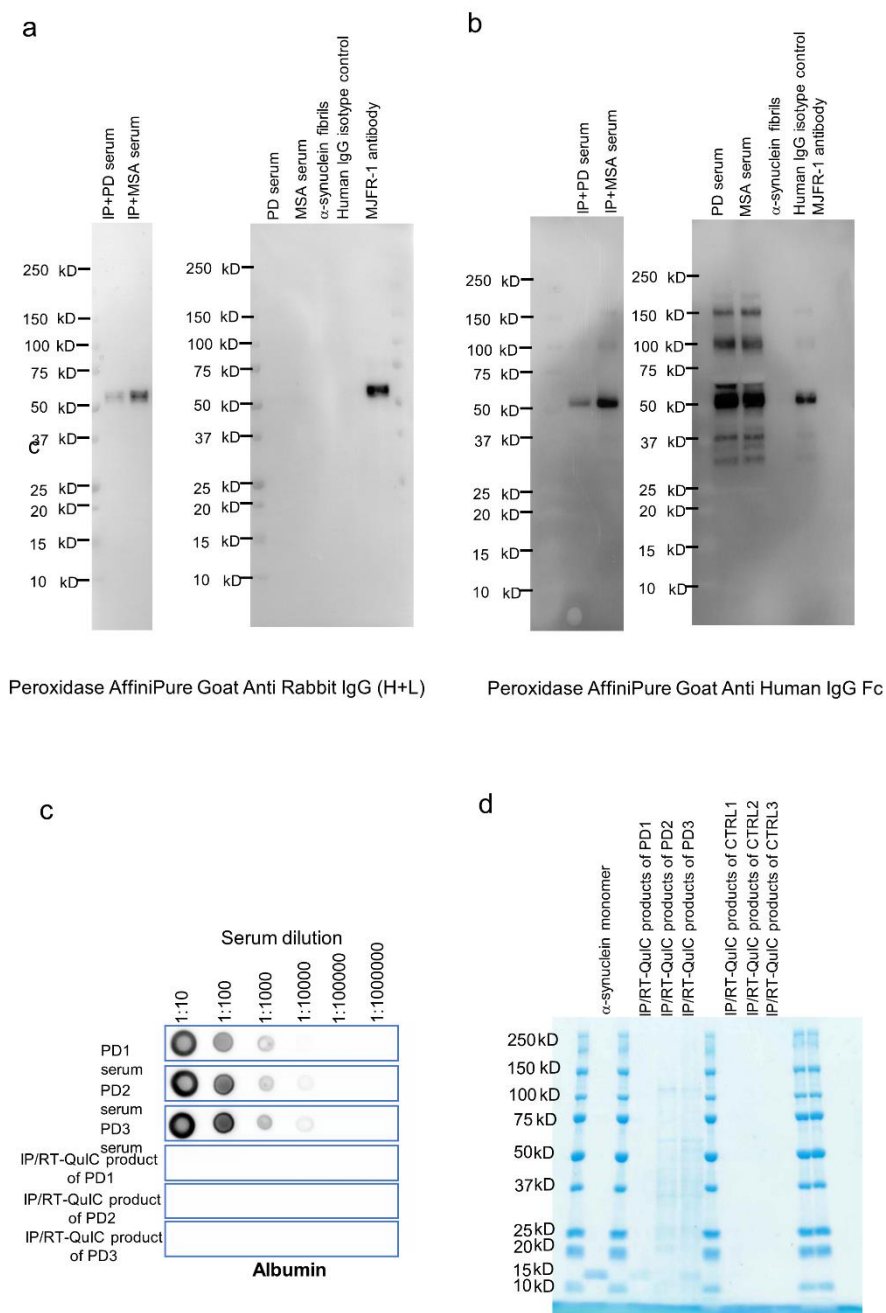

**Supplementary Fig. 11. Contaminant proteins in the serum have little effect on aggregation**

IP products derived from serum contained human IgG (repeated two times) (a) and antibodies used for IP (repeated two times) (b). Dot blot of serum samples shows albumin

123 contamination, but IP/RT-QuIC products show that albumin was removed (c). Coomassie  
124 brilliant blue assay (CBB) shows that there were not large amounts of contaminants in  
125 the IP/RT-QuIC products (repeated two times) (d).  
126



127 **Supplementary Table S1. Percentage distribution of replicates of IP/RT-QuIC**

| Diagnosis                           | N   | IP/RT-QuIC Results +/- | Number of positive wells (samples, n) |                 |                 |                  |
|-------------------------------------|-----|------------------------|---------------------------------------|-----------------|-----------------|------------------|
|                                     |     |                        | Positive                              |                 | Negative        |                  |
| Synucleinopathies                   |     |                        |                                       |                 |                 |                  |
| PD                                  | 221 | 210/11                 | 3 (80)<br>36%                         | 2 (130)<br>59%  | 1 (8)<br>3.60%  | 0 (3)<br>1.40%   |
| MSA                                 | 39  | 25/14                  | 3 (13)<br>30.8%                       | 2 (12)<br>33.3% | 1 (2)<br>5.10%  | 0 (12)<br>30.8%  |
| DLB                                 | 10  | 9/1                    | 3 (4)<br>40%                          | 2 (5)<br>50%    | 1 (1)<br>10%    | 0 (0)<br>0%      |
| Non-synucleinopathies               |     |                        |                                       |                 |                 |                  |
| PSP                                 | 30  | 1/29                   | 3 (1)<br>3%                           | 2 (0)<br>0%     | 1 (9)<br>30%    | 0 (20)<br>67%    |
| AD                                  | 25  | 4/21                   | 3 (3)<br>12%                          | 2 (1)<br>4%     | 1 (8)<br>32%    | 0 (13)<br>52%    |
| Controls                            | 128 | 11/117                 | 3 (6)<br>4.7%                         | 2(5)<br>3.9%    | 1 (44)<br>34.4% | 0 (73)<br>57%    |
| Patients with <i>PRKN</i> mutations | 17  | 0/17                   | 3 (0)<br>0%                           | 2 (0)<br>0%     | 1 (4)<br>23.5%  | 0 (13)<br>76.50% |

128 AD, Alzheimer’s disease; DLB, dementia with Lewy bodies; MSA, multiple system  
129 atrophy; PD, Parkinson’s disease; PSP, progressive supranuclear palsy  
130

**Supplementary Table S2. The performance of IP/RT-QuIC in some cases from the first cohort repeated two times and the reproducibility (intra-batch reproducibility: –1)**

a

| Diagnosis |     | First result      |                   |                   |                   |
|-----------|-----|-------------------|-------------------|-------------------|-------------------|
|           |     | 0/3 (n=3)         | 1/3 (n=5)         | 2/3 (n=5)         | 3/3 (n=5)         |
|           |     | Second result (%) | Second result (%) | Second result (%) | Second result (%) |
| PD        | 0/3 | 3 (100)           | 5 (100)           | 1 (20)            | 0 (0)             |
|           | 1/3 | 0 (0)             | 0 (0)             | 0 (0)             | 0 (0)             |
|           | 2/3 | 0 (0)             | 0 (0)             | 0 (0)             | 0 (0)             |
|           | 3/3 | 0 (0)             | 0 (0)             | 4 (80)            | 5 (100)           |
| Diagnosis |     | First result      |                   |                   |                   |
|           |     | 0/3 (n=5)         | 1/3 (n=2)         | 2/3 (n=5)         | 3/3 (n=5)         |
|           |     | Second result (%) | Second result (%) | Second result (%) | Second result (%) |
| MSA       | 0/3 | 4 (80)            | 1 (50)            | 0 (0)             | 0                 |
|           | 1/3 | 1 (20)            | 1 (50)            | 0 (0)             | 0                 |
|           | 2/3 | 0 (0)             | 0 (0)             | 3 (60)            | 1 (20)            |
|           | 3/3 | 0 (0)             | 0 (0)             | 2 (40)            | 4 (80)            |
| Diagnosis |     | First result      |                   |                   |                   |
|           |     | 0/3 (n=10)        | 1/3 (n=25)        | 2/3 (n=5)         | 3/3 (n=6)         |
|           |     | Second result (%) | Second result (%) | Second result (%) | Second result (%) |

|      |     |        |         |        |          |
|------|-----|--------|---------|--------|----------|
| CTRL | 0/3 | 7 (70) | 13 (52) | 1 (20) | 0 (0)    |
|      | 1/3 | 2 (20) | 11(44)  | 0 (0)  | 0 (0)    |
|      | 2/3 | 0 (0)  | 0 (0)   | 3 (60) | 2 (33.3) |
|      | 3/3 | 1 (10) | 1 (4)   | 1 (20) | 4 (66.7) |

135

136   b

Simple kappa coefficient

| Pair         | Estimate | SE    | 95% CI |
|--------------|----------|-------|--------|
| First-second |          |       |        |
| PD (n=18)    | 0.8900   | 0.107 | 0.68-1 |
| MSA (n=17)   | 1.0000   | 0     | 1-1    |
| CTRL (n=46)  | 0.8300   | 0.097 | 0.64-1 |

137   CTRL, control; MSA, multiple system atrophy; PD, Parkinson’s disease; SE, standard

138   error; CI, confidence interval

139

**Supplementary Table S3. IP/RT-QuIC positive/negative reproducibility was analyzed using samples collected at different dates and times from the same cases (intra-batch reproducibility: –2)**

| Diagnosis | Day 1          |          | Day 2          |          |
|-----------|----------------|----------|----------------|----------|
|           | Positive wells | Judgment | Positive wells | Judgment |
|           |                |          |                |          |
| PD        | 3/3            | Positive | 3/3            | Positive |
| PD        | 3/3            | Positive | 2/3            | Positive |
| PD        | 3/3            | Positive | 3/3            | Positive |
| MSA       | 3/3            | Positive | 3/3            | Positive |
| MSA       | 3/3            | Positive | 3/3            | Positive |
| MSA       | 3/3            | Positive | 3/3            | Positive |
| DLB       | 2/3            | Positive | 3/3            | Positive |
| DLB       | 3/3            | Positive | 3/3            | Positive |
| DLB       | 3/3            | Positive | 3/3            | Positive |
| CTRL      | 0/3            | Negative | 1/3            | Negative |
| CTRL      | 0/3            | Negative | 0/3            | Negative |
| CTRL      | 0/3            | Negative | 0/3            | Negative |

Judgment

Simple kappa

coefficient

| Pair        | Estimate | SE | 95% CI       |
|-------------|----------|----|--------------|
| Total, n=12 |          |    |              |
| Day 1-day 2 | 1.000    |    | 1.000 -1.000 |

Well-positive

Simple kappa

coefficient

| Pair        | Estimate | SE | 95% CI        |
|-------------|----------|----|---------------|
| Total, n=12 |          |    |               |
| Day 1-day 2 | 0.710    |    | 0.1084-0.9053 |

146 CTRL, control; DLB, dementia with Lewy bodies; MSA, multiple system atrophy; PD,  
147 Parkinson’s disease; SE, standard error; CI, confidence interval  
148

149 **Supplementary Table S4. Reproducibility for result determination by three**  
 150 **independent examiners (inter-batch reproducibility: –1)**

| Diagnosis | Evaluator A    |           | Evaluator B    |           | Evaluator C    |           |
|-----------|----------------|-----------|----------------|-----------|----------------|-----------|
|           | Positive wells | Judgement | Positive wells | Judgement | Positive wells | Judgement |
| PD        | 1/3            | Negative  | 1/3            | Negative  | 1/3            | Negative  |
| PD        | 1/3            | Negative  | 1/3            | Negative  | 1/3            | Negative  |
| PD        | 3/3            | Positive  | 3/3            | Positive  | 3/3            | Positive  |
| PD        | 2/3            | Positive  | 2/3            | Positive  | 2/3            | Positive  |
| PD        | 2/3            | Positive  | 2/3            | Positive  | 2/3            | Positive  |
| PD        | 2/3            | Positive  | 2/3            | Positive  | 2/3            | Positive  |
| PD        | 3/3            | Positive  | 3/3            | Positive  | 3/3            | Positive  |
| PD        | 3/3            | Positive  | 3/3            | Positive  | 3/3            | Positive  |
| PD        | 2/3            | Positive  | 2/3            | Positive  | 2/3            | Positive  |
| PD        | 3/3            | Positive  | 1/3            | Negative  | 2/3            | Positive  |
| PD        | 3/3            | Positive  | 3/3            | Positive  | 3/3            | Positive  |
| PD        | 2/3            | Positive  | 2/3            | Positive  | 2/3            | Positive  |
| PD        | 3/3            | Positive  | 3/3            | Positive  | 3/3            | Positive  |
| PD        | 3/3            | Positive  | 3/3            | Positive  | 3/3            | Positive  |
| PD        | 3/3            | Positive  | 3/3            | Positive  | 3/3            | Positive  |
| PD        | 2/3            | Positive  | 1/3            | Negative  | 1/3            | Negative  |
| PD        | 1/3            | Negative  | 1/3            | Negative  | 1/3            | Negative  |
| PD        | 2/3            | Positive  | 1/3            | Negative  | 1/3            | Negative  |
| PD        | 0/3            | Negative  | 0/3            | Negative  | 0/3            | Negative  |
| PD        | 3/3            | Positive  | 3/3            | Positive  | 3/3            | Positive  |
| PD        | 3/3            | Positive  | 3/3            | Positive  | 3/3            | Positive  |
| PD        | 1/3            | Negative  | 1/3            | Negative  | 1/3            | Negative  |
| PD        | 0/3            | Negative  | 0/3            | Negative  | 0/3            | Negative  |
| PD        | 0/3            | Negative  | 0/3            | Negative  | 0/3            | Negative  |
| PD        | 2/3            | Positive  | 1/3            | Negative  | 1/3            | Negative  |
| MSA       | 3/3            | Positive  | 3/3            | Positive  | 3/3            | Positive  |
| MSA       | 3/3            | Positive  | 3/3            | Positive  | 3/3            | Positive  |
| MSA       | 1/3            | Negative  | 1/3            | Negative  | 1/3            | Negative  |
| MSA       | 2/3            | Positive  | 2/3            | Positive  | 2/3            | Positive  |
| MSA       | 3/3            | Positive  | 3/3            | Positive  | 3/3            | Positive  |

|      |     |          |     |          |     |          |
|------|-----|----------|-----|----------|-----|----------|
| MSA  | 3/3 | Positive | 3/3 | Positive | 3/3 | Positive |
| MSA  | 0/3 | Negative | 1/3 | Negative | 0/3 | Negative |
| MSA  | 2/3 | Positive | 1/3 | Negative | 1/3 | Negative |
| MSA  | 1/3 | Negative | 1/3 | Negative | 1/3 | Negative |
| MSA  | 3/3 | Positive | 3/3 | Positive | 3/3 | Positive |
| MSA  | 2/3 | Positive | 1/3 | Negative | 1/3 | Negative |
| MSA  | 2/3 | Positive | 1/3 | Negative | 1/3 | Negative |
| MSA  | 0/3 | Negative | 0/3 | Negative | 0/3 | Negative |
| MSA  | 2/3 | Positive | 2/3 | Positive | 2/3 | Positive |
| MSA  | 2/3 | Positive | 2/3 | Positive | 2/3 | Positive |
| MSA  | 0/3 | Negative | 0/3 | Negative | 0/3 | Negative |
| DLB  | 3/3 | Positive | 3/3 | Positive | 3/3 | Positive |
| DLB  | 3/3 | Positive | 3/3 | Positive | 3/3 | Positive |
| DLB  | 1/3 | Negative | 1/3 | Negative | 1/3 | Negative |
| DLB  | 2/3 | Positive | 2/3 | Positive | 2/3 | Positive |
| DLB  | 2/3 | Positive | 2/3 | Positive | 2/3 | Positive |
| CTRL | 1/3 | Negative | 1/3 | Negative | 1/3 | Negative |
| CTRL | 1/3 | Negative | 1/3 | Negative | 1/3 | Negative |
| CTRL | 0/2 | Negative | 0/2 | Negative | 0/2 | Negative |
| CTRL | 0/2 | Negative | 0/2 | Negative | 0/2 | Negative |
| CTRL | 0/2 | Negative | 0/2 | Negative | 0/2 | Negative |
| CTRL | 0/2 | Negative | 0/2 | Negative | 0/2 | Negative |
| CTRL | 0/2 | Negative | 0/2 | Negative | 0/2 | Negative |
| CTRL | 0/2 | Negative | 0/2 | Negative | 0/2 | Negative |
| CTRL | 0/2 | Negative | 0/2 | Negative | 0/2 | Negative |
| CTRL | 0/2 | Negative | 0/2 | Negative | 0/2 | Negative |
| CTRL | 0/2 | Negative | 0/2 | Negative | 0/2 | Negative |
| CTRL | 0/2 | Negative | 0/2 | Negative | 0/2 | Negative |
| CTRL | 0/2 | Negative | 0/2 | Negative | 0/2 | Negative |
| CTRL | 0/2 | Negative | 0/2 | Negative | 0/2 | Negative |
| CTRL | 0/2 | Negative | 0/2 | Negative | 0/2 | Negative |
| CTRL | 0/2 | Negative | 0/2 | Negative | 0/2 | Negative |
| CTRL | 0/2 | Negative | 0/2 | Negative | 0/2 | Negative |
| CTRL | 0/2 | Negative | 0/2 | Negative | 0/2 | Negative |
| CTRL | 0/2 | Negative | 0/2 | Negative | 0/2 | Negative |
| CTRL | 0/2 | Negative | 0/2 | Negative | 0/2 | Negative |
| CTRL | 0/3 | Negative | 0/3 | Negative | 0/3 | Negative |
| CTRL | 3/3 | Positive | 3/3 | Positive | 3/3 | Positive |
| CTRL | 0/3 | Negative | 0/3 | Negative | 0/3 | Negative |

|      |     |          |     |          |     |          |
|------|-----|----------|-----|----------|-----|----------|
| CTRL | 1/3 | Negative | 1/3 | Negative | 1/3 | Negative |
| CTRL | 1/3 | Negative | 1/3 | Negative | 1/3 | Negative |
| CTRL | 1/3 | Negative | 1/3 | Negative | 1/3 | Negative |
| CTRL | 0/3 | Negative | 0/3 | Negative | 0/3 | Negative |

Judgement

Simple kappa coefficient

| Pair        | Estimate | SE     | 95% CI        |
|-------------|----------|--------|---------------|
| Total, n=70 |          |        |               |
| A-B         | 0.7987   | 0.0707 | 0.6601-0.9373 |
| A-C         | 0.8276   | 0.0663 | 0.6976-0.9575 |
| B-C         | 0.9701   | 0.0297 | 0.9118-1.0000 |

Well-positive

Judge

Simple kappa coefficient

| Pair        | Estimate | SE     | 95% CI        |
|-------------|----------|--------|---------------|
| Total, n=70 |          |        |               |
| A-B         | 0.8462   | 0.0498 | 0.7487-0.9438 |
| A-C         | 0.8649   | 0.0473 | 0.7722-0.9575 |
| B-C         | 0.961    | 0.0272 | 0.9078-1.0000 |

CTRL, control; DLB, dementia with Lewy bodies; MSA, multiple system atrophy; PD, Parkinson's disease; SE, standard error; CI, confidence interval



**Supplementary Table S5. Reproducibility of the IP/RT-QuIC technique assessed by two independent examiners (inter-batch reproducibility: –2)**

| Diagnosis | Examiner A     |           | Examiner B     |           |
|-----------|----------------|-----------|----------------|-----------|
|           | Positive Wells | Judgement | Positive Wells | Judgement |
| PD        | 2/3            | Positive  | 3/3            | Positive  |
| PD        | 2/3            | Positive  | 3/3            | Positive  |
| PD        | 2/3            | Positive  | 3/3            | Positive  |
| PD        | 2/3            | Positive  | 3/3            | Positive  |
| PD        | 3/3            | Positive  | 2/3            | Positive  |
| PD        | 3/3            | Positive  | 3/3            | Positive  |
| PD        | 3/3            | Positive  | 2/3            | Positive  |
| PD        | 2/3            | Positive  | 2/3            | Positive  |
| PD        | 2/3            | Positive  | 3/3            | Positive  |
| PD        | 3/3            | Positive  | 3/3            | Positive  |
| MSA       | 2/3            | Positive  | 3/3            | Positive  |
| MSA       | 1/3            | Negative  | 3/3            | Positive  |
| MSA       | 3/3            | Positive  | 3/3            | Positive  |
| MSA       | 1/3            | Negative  | 2/3            | Positive  |
| MSA       | 1/3            | Negative  | 2/3            | Positive  |
| MSA       | 2/3            | Positive  | 3/3            | Positive  |
| MSA       | 1/3            | Negative  | 1/3            | Negative  |
| MSA       | 3/3            | Positive  | 3/3            | Positive  |
| MSA       | 3/3            | Positive  | 3/3            | Positive  |
| MSA       | 3/3            | Positive  | 3/3            | Positive  |
| DLB       | 2/3            | Positive  | 3/3            | Positive  |
| DLB       | 3/3            | Positive  | 0/3            | Negative  |
| DLB       | 3/3            | Positive  | 2/3            | Positive  |
| DLB       | 3/3            | Positive  | 2/3            | Positive  |
| DLB       | 3/3            | Positive  | 3/3            | Positive  |
| DLB       | 3/3            | Positive  | 3/3            | Positive  |
| DLB       | 2/3            | Positive  | 0/3            | Negative  |
| DLB       | 3/3            | Positive  | 3/3            | Positive  |
| DLB       | 2/3            | Positive  | 1/3            | Negative  |
| DLB       | 3/3            | Positive  | 3/3            | Positive  |

|      |     |          |     |          |
|------|-----|----------|-----|----------|
| CTRL | 0/3 | Negative | 1/3 | Negative |
| CTRL | 0/3 | Negative | 0/3 | Negative |
| CTRL | 0/3 | Negative | 0/3 | Negative |
| CTRL | 1/3 | Negative | 0/3 | Negative |
| CTRL | 0/3 | Negative | 0/3 | Negative |
| CTRL | 0/3 | Negative | 3/3 | Positive |

159

160

Simple kappa coefficient

| Pair        | Estimate | SE    | 95% CI      |
|-------------|----------|-------|-------------|
| Total, n=36 |          |       |             |
|             | 0.680    | 0.150 | 0.390-0.970 |

161

CTRL, control; DLB, dementia with Lewy bodies; MSA, multiple system atrophy; PD,

162

Parkinson’s disease; SE, standard error; CI, confidence interval

163

**Supplementary Table S6. Serum  $\alpha$ -synuclein IP/RT-QuIC results of MSA-P and MSA-C cases.**

| Diagnosis | N  | IP/RT-QuIC Results +/- | Positive results |
|-----------|----|------------------------|------------------|
| MSA       | 39 | 25/14                  | 64%              |
| MSA-P     | 26 | 17/9                   | 65%              |
| MSA-C     | 13 | 8/5                    | 62%              |

Data are presented as numbers. IP/RT-QuIC, immunoprecipitation/real-time quaking-induced conversion; MSA, multiple system atrophy; MSA-C, MSA cerebellar variant; MSA-P, MSA Parkinsonian variant; N, number of participants who received IP/RT-QuIC

**Supplementary Table S7. The average age of the control cases with positive IP/RT-**

**QuIC results.**

| <b>Age</b>     | <b>N (%)</b> |
|----------------|--------------|
| <b>(years)</b> |              |
| 20–30          | 0/2 (0)      |
| 31–40          | 0/5 (0)      |
| 41–50          | 1/28 (3.6)   |
| 51–60          | 0/17 (0)     |
| 61–70          | 1/21 (4.7)   |
| 71–80          | 5/38 (10)    |
| 81–90          | 4/17 (23)    |

Data are presented as numbers (%). N, number of participants who received IP/RT-

QuIC

**Supplementary Table S8. The correlation between IP/RT-QuIC parameters and the MIBG H/M ratio of (a) PD and (B) MSA cases.**

a

| PD                  | MIBG H/M ratio | MIBG H/M ratio | p-value |
|---------------------|----------------|----------------|---------|
|                     | reduced        | normal         |         |
| IP/RT-QuIC-positive | 127            | 19             |         |
| IP/RT-QuIC-negative | 0              | 2              | 0.0193  |
| Total               | 127            | 21             |         |

b

| MSA                 | MIBG H/M ratio | MIBG H/M ratio | p-value |
|---------------------|----------------|----------------|---------|
|                     | reduced        | normal         |         |
| IP/RT-QuIC-positive | 2              | 9              |         |
| IP/RT-QuIC-negative | 1              | 7              | NS      |
| Total               | 3              | 16             |         |

Data are presented as numbers. P-values were obtained using (a) Pearson's chi-squared test and (b) Fisher's exact test. IP/RT-QuIC, immunoprecipitation/real-time quaking-induced conversion; MIBG,  $^{123}\text{I}$ -metaiodobenzylguanidine scintigraphy; MSA, multiple system atrophy; PD, Parkinson's disease

**Supplementary Table S9. The correlation between IP/RT-QuIC results and synucleinopathies (PD and MSA).**

|       | IP/RT-QuIC-<br>positive | IP/RT-QuIC-<br>negative | p-value |
|-------|-------------------------|-------------------------|---------|
| PD    | 210                     | 11                      |         |
| MSA   | 25                      | 14                      | <0.0001 |
| Total | 235                     | 25                      |         |

Data are presented as numbers. P-values were obtained using Pearson's chi-square test ( $p < 0.0001$ ).

IP/RT-QuIC, immunoprecipitation/real-time quaking-induced conversion; MSA, multiple system atrophy; PD, Parkinson's disease

**Supplementary Table S10. Characteristics of the study participants from whom both serum and CSF samples were obtained**

|                                        | <b>Controls<br/>(n=35)</b> | <b>Parkinson's<br/>disease (n=6)</b> | <b>Multiple system atrophy<br/>(n=3)</b> |
|----------------------------------------|----------------------------|--------------------------------------|------------------------------------------|
| Age [years], mean (SD)                 | 52 (18)                    | 63 (9.2)                             | 61 (16)                                  |
| Men, n (%)                             | 22 (63)                    | 2 (33)                               | 1 (33)                                   |
| Hoehn–Yahr stages, mean<br>(SD)        | NA                         | 2.8 (0.9)                            | 3.0 (0.8)                                |
| UPDRS-III, mean (SD)                   | NA                         | 29 (9.2)                             | 36 (14)                                  |
| Disease duration [years],<br>mean (SD) | NA                         | 9.5 (3.0)                            | 4.6 (1.2)                                |

Both serum and CSF data are available from 9 patients (6 PD and 3 MSA) and 35 controls.

CSF, cerebrospinal fluid; MSA, multiple system atrophy; NA, Not Applicable; SD,

standard deviation; UPDRS-III, Unified Parkinson's Disease Rating Scale Part III

**Supplementary Table S11. Reproducibility for cell assay determination by two independent examiners (intra-batch/inter-batch reproducibility)**

| Diagnosis | Judgement |
|-----------|-----------|
| PD        | Correct   |
| PD        | Correct   |
| PD        | Correct   |
| PD        | Correct   |
| PD        | Correct   |
| PD        | Correct   |
| PD        | Correct   |
| PD        | Correct   |
| PD        | Correct   |
| PD        | Correct   |
| PD        | Correct   |
| PD        | Correct   |
| PD        | Correct   |
| PD        | Correct   |
| PD        | Correct   |
| PD        | Correct   |
| PD        | Correct   |
| PD        | Correct   |
| PD        | Correct   |
| PD        | Correct   |
| PD        | Correct   |
| MSA       | Correct   |
| MSA       | Correct   |
| MSA       | Correct   |
| MSA       | Correct   |
| MSA       | Correct   |
| MSA       | Correct   |
| MSA       | Correct   |
| MSA       | Correct   |
| MSA       | Correct   |
| MSA       | Failure   |
| MSA       | Failure   |
| MSA       | Correct   |
| MSA       | Correct   |



|     |         |
|-----|---------|
| MSA | Failure |
| MSA | Failure |
| MSA | Failure |
| MSA | Failure |
| MSA | Correct |
| MSA | Correct |
| MSA | Correct |
| MSA | Correct |
| DLB | Correct |
| DLB | Failure |
| DLB | Correct |
| DLB | Failure |
| DLB | Correct |

---

|               |      |
|---------------|------|
| Accuracy rate |      |
| PD            | 100% |
| MSA           | 70%  |
| DLB           | 60%  |

198  
199

**Intra-batch**

| Diagnosis | Judge1 | Judgement | Judge 2 | Judgement |
|-----------|--------|-----------|---------|-----------|
| PD        | PD     | Correct   | PD      | Correct   |
| PD        | PD     | Correct   | PD      | Correct   |
| PD        | PD     | Correct   | PD      | Correct   |
| MSA       | MSA    | Correct   | MSA     | Correct   |
| MSA       | DLB    | Failure   | MSA     | Correct   |
| MSA       | MSA    | Correct   | MSA     | Correct   |
| DLB       | DLB    | Correct   | DLB     | Correct   |
| DLB       | DLB    | Correct   | MSA     | Failure   |
| DLB       | DLB    | Correct   | DLB     | Correct   |
| CTRL      | CTRL   | Correct   | CTRL    | Correct   |
| CTRL      | CTRL   | Correct   | CTRL    | Correct   |

200

| Simple kappa coefficient |          |    |        |
|--------------------------|----------|----|--------|
| Pair                     | Estimate | SE | 95% CI |

|             |      |       |        |
|-------------|------|-------|--------|
| Total, n=11 |      |       |        |
|             | 0.84 | 0.103 | 0.64-1 |

201

202 **Inter-batch**

| Diagnosis | Evaluator A | Evaluator B |
|-----------|-------------|-------------|
| PD        | PD          | PD          |
| PD        | PD          | PD          |
| MSA       | MSA         | DLB         |
| MSA       | MSA         | MSA         |
| DLB       | DLB         | DLB         |
| DLB       | DLB         | MSA         |
| CTRL      | CTRL        | CTRL        |

203

| Simple kappa coefficient |          |    |        |
|--------------------------|----------|----|--------|
| Pair                     | Estimate | SE | 95% CI |

|            |      |       |         |
|------------|------|-------|---------|
| Total, n=7 |      |       |         |
|            | 0.75 | 0.177 | 0.404-1 |

204

205

| Diagnosis | Evaluator B | Evaluator C |
|-----------|-------------|-------------|
| PD        | PD          | PD          |
| PD        | PD          | PD          |
| PD        | PD          | PD          |
| PD        | PD          | PD          |
| PD        | PD          | PD          |
| PD        | PD          | PD          |
| PD        | PD          | PD          |
| PD        | PD          | PD          |
| PD        | PD          | PD          |
| PD        | PD          | PD          |
| MSA       | DLB         | DLB         |

|     |     |     |
|-----|-----|-----|
| MSA | MSA | MSA |
| MSA | MSA | MSA |
| MSA | MSA | MSA |
| MSA | MSA | MSA |
| MSA | MSA | MSA |
| MSA | DLB | DLB |
| DLB | DLB | DLB |
| DLB | DLB | DLB |
| DLB | DLB | DLB |
| DLB | DLB | DLB |
| DLB | DLB | DLB |
| DLB | DLB | DLB |
| DLB | DLB | DLB |

206

Simple kappa coefficient

| Pair        | Estimate | SE | 95% CI |
|-------------|----------|----|--------|
| Total, n=23 | 1.00     | 0  | 1-1    |

207

Evaluator A

| Diagnosis | Predicted pathology | FL type | DC type | PC type | Not determined | Highest% |
|-----------|---------------------|---------|---------|---------|----------------|----------|
| PD        | PD                  | 90.3%   | 3.2%    | 0.0%    | 6.5%           | 90.3%    |
| PD        | PD                  | 91.7%   | 8.3%    | 0.0%    | 0.0%           | 91.7%    |
| PD        | PD                  | 100.0%  | 0.0%    | 0.0%    | 0.0%           | 100.0%   |
| PD        | PD                  | 94.1%   | 2.9%    | 0.0%    | 2.9%           | 94.1%    |
| PD        | PD                  | 92.9%   | 7.1%    | 0.0%    | 0.0%           | 92.9%    |
| PD        | PD                  | 91.7%   | 8.3%    | 0.0%    | 0.0%           | 91.7%    |
| MSA       | MSA                 | 0.0%    | 80.0%   | 20.0%   | 0.0%           | 80.0%    |
| MSA       | DLB/PDD             | 0.0%    | 18.2%   | 81.8%   | 0.0%           | 81.8%    |
| MSA       | DLB/PDD             | 7.1%    | 14.3%   | 78.6%   | 0.0%           | 78.6%    |
| MSA       | MSA                 | 0.0%    | 81.3%   | 18.8%   | 0.0%           | 81.3%    |
| MSA       | MSA                 | 0.0%    | 78.6%   | 21.4%   | 0.0%           | 78.6%    |
| DLB/PDD   | DLB/PDD             | 0.0%    | 0.0%    | 100.0%  | 0.0%           | 100.0%   |
| DLB/PDD   | DLB/PDD             | 0.0%    | 0.0%    | 85.7%   | 14.3%          | 85.7%    |

|         |         |      |       |        |       |        |
|---------|---------|------|-------|--------|-------|--------|
| DLB/PDD | DLB/PDD | 0.0% | 14.3% | 57.1%  | 28.6% | 57.1%  |
| DLB/PDD | DLB/PDD | 0.0% | 37.5% | 50.0%  | 12.5% | 50.0%  |
| DLB/PDD | DLB/PDD | 0.0% | 0.0%  | 100.0% | 0.0%  | 100.0% |

## Evaluator B

| Diagnosis | Predicted pathology | FL type | DC type | PC type | Not determined | Highest% |
|-----------|---------------------|---------|---------|---------|----------------|----------|
| PD        | PD                  | 90.6%   | 0.0%    | 3.1%    | 6.3%           | 90.6%    |
| PD        | PD                  | 86.4%   | 0.0%    | 4.5%    | 9.1%           | 86.4%    |
| PD        | PD                  | 76.5%   | 5.9%    | 5.9%    | 11.8%          | 76.5%    |
| PD        | PD                  | 91.9%   | 0.0%    | 5.4%    | 2.7%           | 91.9%    |
| PD        | PD                  | 72.7%   | 9.1%    | 0.0%    | 18.2%          | 72.7%    |
| PD        | PD                  | 85.7%   | 0.0%    | 0.0%    | 14.3%          | 85.7%    |
| MSA       | MSA                 | 0.0%    | 82.4%   | 11.8%   | 5.9%           | 82.4%    |
| MSA       | DLB/PDD             | 12.5%   | 33.3%   | 50.0%   | 4.2%           | 50.0%    |
| MSA       | DLB/PDD             | 5.0%    | 40.0%   | 50.0%   | 5.0%           | 50.0%    |
| MSA       | MSA                 | 16.7%   | 55.6%   | 22.2%   | 5.6%           | 55.6%    |
| MSA       | MSA                 | 5.6%    | 66.7%   | 22.2%   | 5.6%           | 66.7%    |
| DLB/PDD   | DLB/PDD             | 0.0%    | 0.0%    | 84.6%   | 15.4%          | 84.6%    |
| DLB/PDD   | DLB/PDD             | 9.1%    | 9.1%    | 81.8%   | 0.0%           | 81.8%    |
| DLB/PDD   | DLB/PDD             | 6.7%    | 26.7%   | 53.3%   | 13.3%          | 53.3%    |
| DLB/PDD   | DLB/PDD             | 18.2%   | 27.3%   | 45.5%   | 9.1%           | 45.5%    |
| DLB/PDD   | DLB/PDD             | 0.0%    | 18.2%   | 72.7%   | 9.1%           | 72.7%    |

## Evaluator C

| Diagnosis | Predicted pathology | FL type | DC type | PC type | Not determined | Highest% |
|-----------|---------------------|---------|---------|---------|----------------|----------|
| PD        | PD                  | 85.7%   | 2.9%    | 8.6%    | 2.9%           | 85.7%    |
| PD        | PD                  | 84.0%   | 0.0%    | 12.0%   | 4.0%           | 84.0%    |
| PD        | PD                  | 85.7%   | 0.0%    | 9.5%    | 4.8%           | 85.7%    |
| PD        | PD                  | 94.6%   | 0.0%    | 0.0%    | 5.4%           | 94.6%    |
| PD        | PD                  | 87.5%   | 4.2%    | 4.2%    | 4.2%           | 88.0%    |
| PD        | PD                  | 80.0%   | 5.0%    | 15.0%   | 0.0%           | 80.0%    |
| MSA       | MSA                 | 30.0%   | 40.0%   | 25.0%   | 5.0%           | 40.0%    |
| MSA       | MSA                 | 10.0%   | 45.0%   | 40.0%   | 5.0%           | 45.0%    |
| MSA       | MSA                 | 17.4%   | 47.8%   | 34.8%   | 0.0%           | 47.8%    |

|         |         |       |       |       |       |       |
|---------|---------|-------|-------|-------|-------|-------|
| MSA     | MSA     | 5.3%  | 47.4% | 36.8% | 10.5% | 47.0% |
| MSA     | MSA     | 10.5% | 52.6% | 31.6% | 5.3%  | 52.6% |
| DLB/PDD | DLB/PDD | 0.0%  | 0.0%  | 92.9% | 7.1%  | 92.9% |
| DLB/PDD | DLB/PDD | 0.0%  | 30.0% | 70.0% | 0.0%  | 70.0% |
| DLB/PDD | DLB/PDD | 8.3%  | 25.0% | 58.3% | 8.3%  | 58.3% |
| DLB/PDD | DLB/PDD | 10.0% | 10.0% | 80.0% | 0.0%  | 80.0% |
| DLB/PDD | DLB/PDD | 0.0%  | 16.7% | 66.7% | 16.7% | 67.0% |

208 CTRL, control; DLB, dementia with Lewy bodies; MSA, multiple system atrophy; PD,  
209 Parkinson’s disease; PDD, PD with dementia; SE, standard error

210  
211

**Supplementary Table S12. Results of the IP/RT-QuIC of the mouse brain (a) and serum (b) after the injection of PD- or MSA-seeds into the mouse brain**

a

|         |          | Positive wells | PD-seed-injected brain (6 months) n=3 | PD-seed-injected brain (1 year) n=3 | MSA-seed-injected brain (6 months) n=3 | MSA-seed-injected brain (1 year) n=3 |
|---------|----------|----------------|---------------------------------------|-------------------------------------|----------------------------------------|--------------------------------------|
| RT-QuIC | Negative | 0/3 (%)        | 0 (0)                                 | 0 (0)                               | 0 (0)                                  | 0 (0)                                |
|         |          | 1/3 (%)        | 0 (0)                                 | 0 (0)                               | 0 (0)                                  | 0 (0)                                |
|         | Positive | 2/3 (%)        | 0 (0)                                 | 0 (0)                               | 0 (0)                                  | 0 (0)                                |
|         |          | 3/3 (%)        | 3 (100)                               | 3 (100)                             | 3 (100)                                | 3 (100)                              |

b

|            |          | Positive wells | PD-seed-injected mouse serum (6 months) n=3 | PD-seed-injected mouse serum (1 year) n=3 | MSA-seed-injected mouse serum (6 months) n=3 | MSA-seed-injected mouse serum (1 year) n=3 |
|------------|----------|----------------|---------------------------------------------|-------------------------------------------|----------------------------------------------|--------------------------------------------|
| IP/RT-QuIC | Negative | 0/3 (%)        | 3 (100)                                     | 2 (67)                                    | 3 (100)                                      | 3 (100)                                    |
|            |          | 1/3 (%)        | 0 (0)                                       | 1 (33)                                    | 0 (0)                                        | 0 (0)                                      |
|            | Positive | 2/3 (%)        | 0 (0)                                       | 0 (0)                                     | 0 (0)                                        | 0 (0)                                      |
|            |          | 3/3 (%)        | 0 (0)                                       | 0 (0)                                     | 0 (0)                                        | 0 (0)                                      |

IP, Immunoprecipitation; MSA, multiple system atrophy; PD, Parkinson's disease; RT-QuIC, real-time quaking-induced conversion

**Supplementary Table S13. The correlation between IP/RT-QuIC parameters and characteristics and clinical parameters of rapid eye movement sleep behavior disorder.**

|           | Forming Rate   |               | $T_{1/2}$     |               | $T_{\max}$     |              | AUC            |               |
|-----------|----------------|---------------|---------------|---------------|----------------|--------------|----------------|---------------|
|           | <b>R</b>       | <b>P</b>      | <b>r</b>      | <b>p</b>      | <b>r</b>       | <b>p</b>     | <b>r</b>       | <b>p</b>      |
| Age       | 0.4136         | 0.1814        | 0.2781        | 0.3814        | 0.2888         | 0.3627       | 0.2992         | 0.3448        |
| UPDRS-III | -0.04914       | 0.8794        | -0.114        | 0.7242        | -0.1123        | 0.7282       | -0.08874       | 0.7839        |
| Disease   | <u>0.7315</u>  | <u>0.0069</u> | 0.5158        | 0.0861        | 0.5267         | 0.0785       | 0.7685         | 0.0035        |
| Duration  |                |               |               |               |                |              |                |               |
| SBR       | <u>-0.8331</u> | <u>0.0053</u> | <u>-0.803</u> | <u>0.0092</u> | <u>-0.8042</u> | <u>0.009</u> | <u>-0.7396</u> | <u>0.0227</u> |

Correlations between variables were assessed using *two-tailed* pearson correlation analyses.

Underlined values indicate  $p < 0.05$ . AUC, area under the curve; SBR, specific binding ratio;  $T_{1/2}$ , time to reach 130k fluorescence;  $T_{\max}$ , time to reach maximum (260k) fluorescence; UPDRS-III, Unified Parkinson's Disease Rating Scale Part III

229 **Supplementary Table S14. Mutations in *Parkin*-linked Parkinson's disease cases.**


---

Exon 3 deletion (heterozygous)/c.535-3A>G (p.G179RfsX10) (heterozygous)

---

Exon 2-4 del/exon 4 del (compound heterozygous)

---

Exon 3 deletion (heterozygous)/exon 4 deletion (heterozygous)

---

Exon 4 deletion (homozygous)

---

Exon 2-4 deletion (heterozygous)/c.535-3A>G (p.G179RfsX10) (heterozygous)

---

Exon 6-7 deletion (homozygous)

---

Exon 2-4 deletion (homozygous)

---

Exon 2-3 deletion (heterozygous)/c.1358G>A (p.W453X) (heterozygous)

---

Exon 5 deletion (homozygous)

---

Exon 3-5 deletion (heterozygous)/exon 3-7 duplication (heterozygous)

---

Exon 6 duplication (homozygous)

---

Exon 2-4 deletion (heterozygous)/exon 5-6 deletion (heterozygous)

---

Exon 2-4 deletion (homozygous)

---

c.818G>A (p.N273S) (heterozygous)

---

c.535delG (p.G179VfsX9) (heterozygous)

---

c.1358G>A (p.W453X) (heterozygous)

---



---

Exon 3 deletion (homozygous)

---

230
